# Supplementary material
Source: HighWire-hosted journal article supplement (https://jnm.snmjournals.org/highwire/filestream/95039/field_highwire_adjunct_files/0/176511_Supplemental_Data.pdf)
Supplement: 176511_Supplemental_Data.pdf [file 176511_Supplemental_Data.pdf]

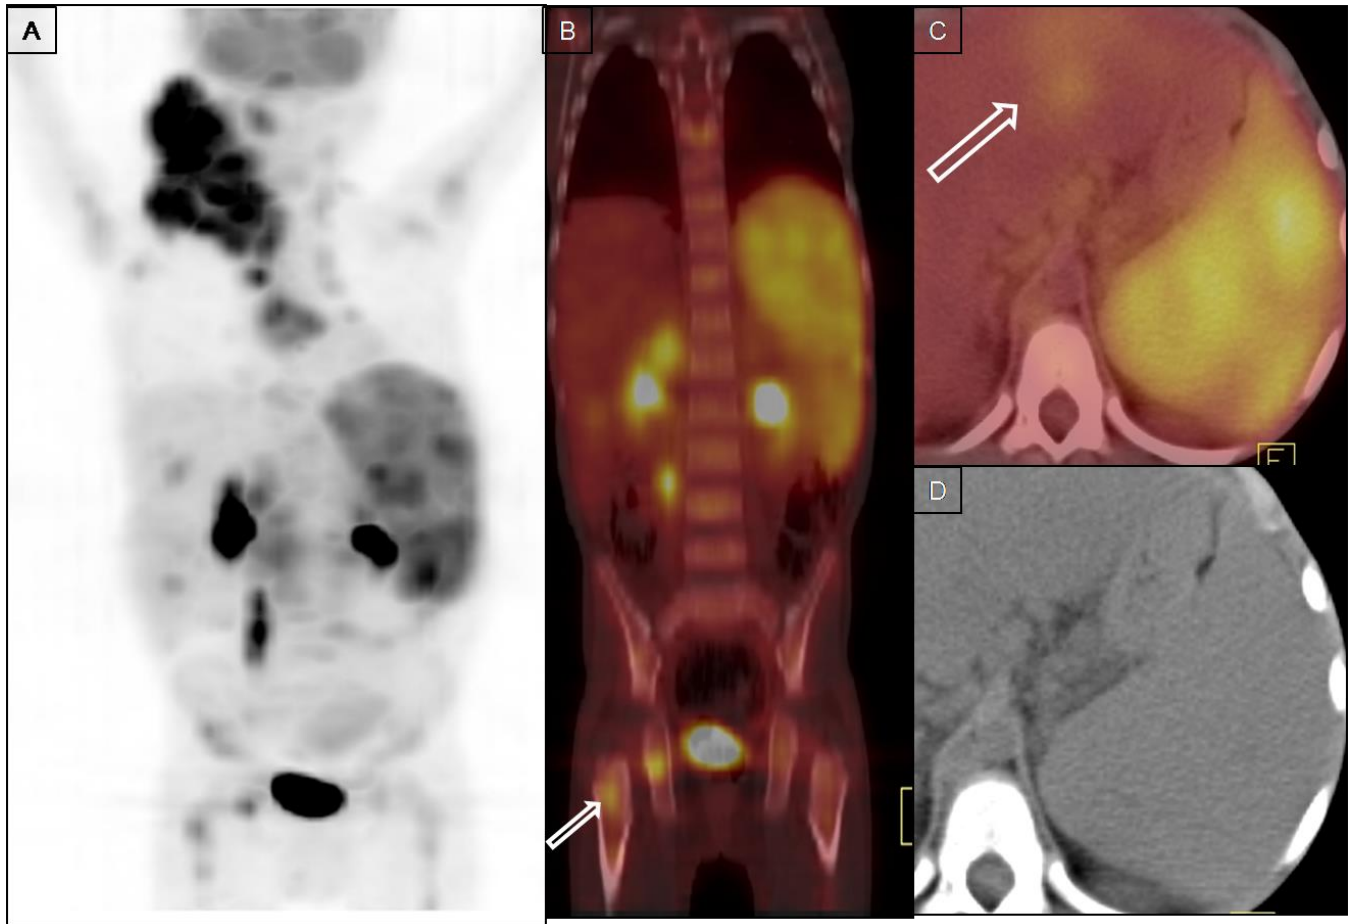

**SUPPLEMENTAL FIGURE 1:** Baseline PET-CT image of patient no. 48 who had involvement of cervical , mediastinal and retroperitoneal lymph nodes and spleen involvement (A,B) with additional involvement of liver (arrow in C) and bone marrow (arrow in B) not detected CECT (D). (Upstaging at baseline).

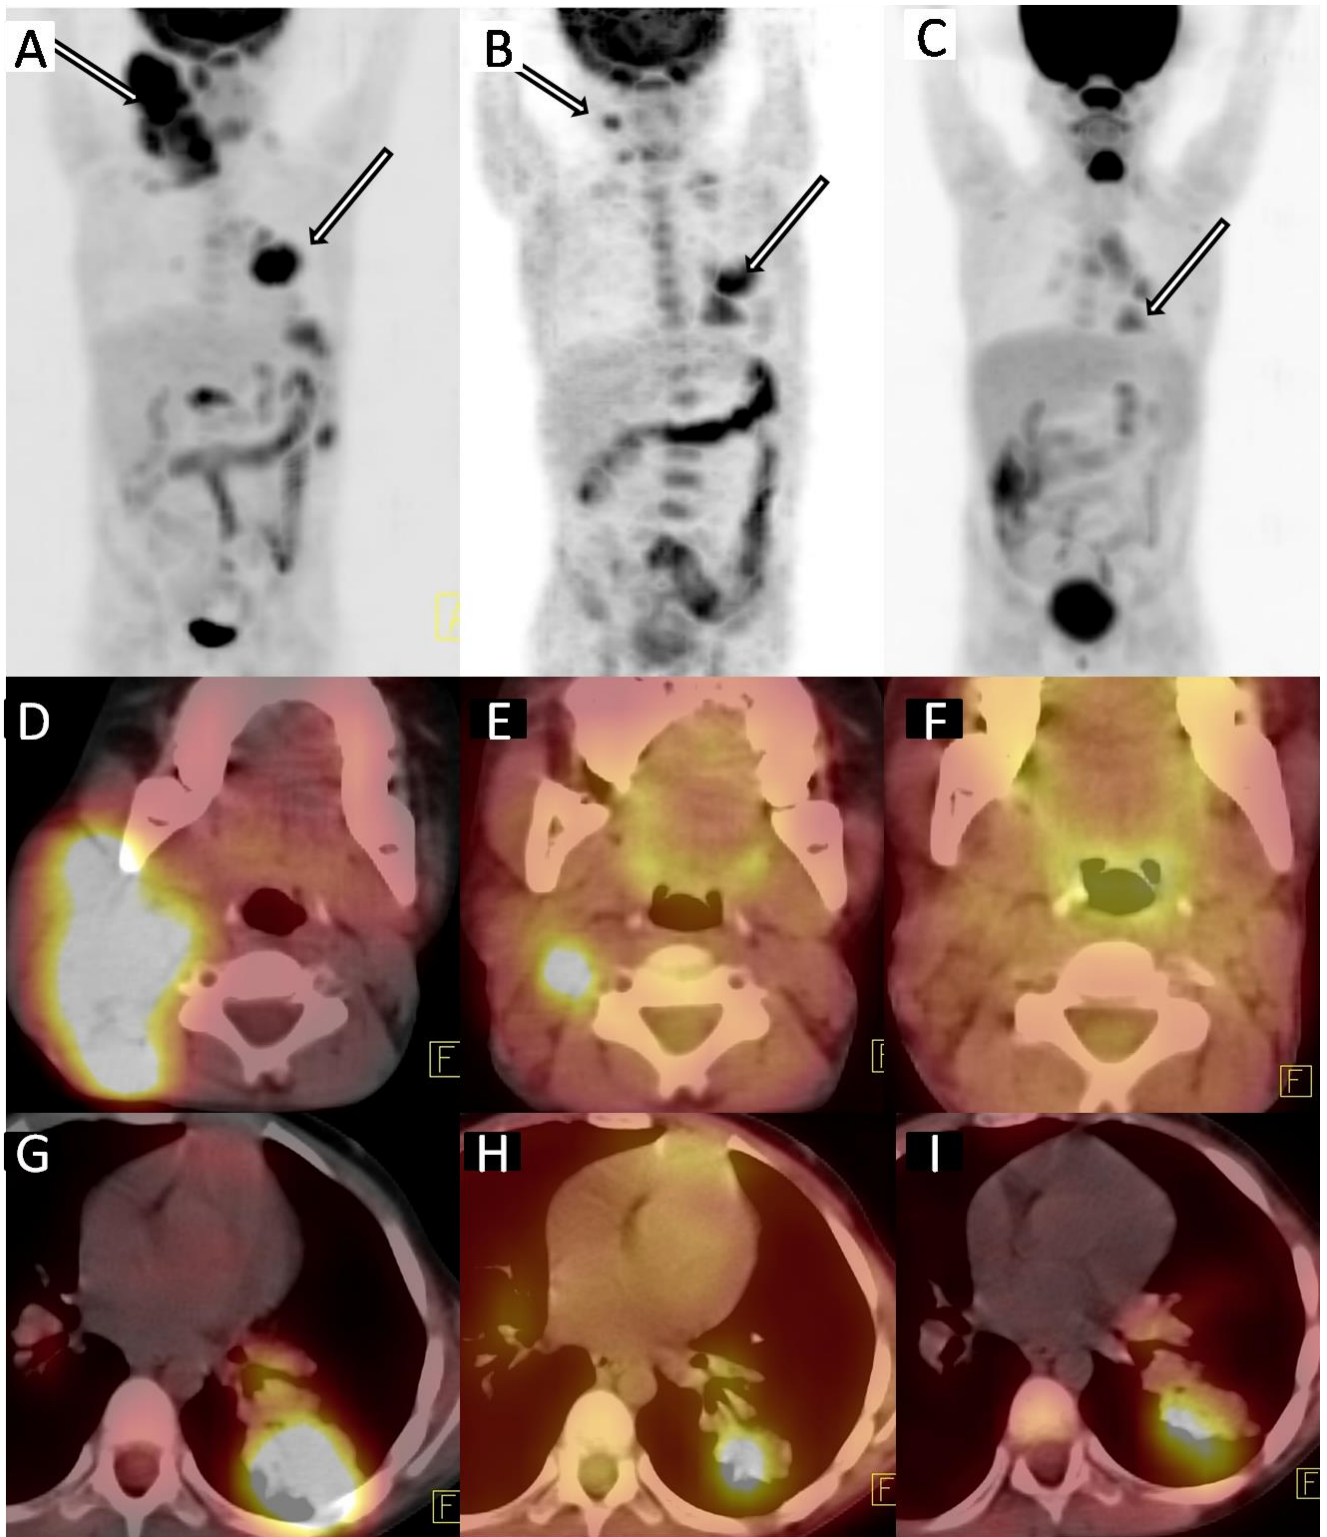

**SUPPLEMENTAL FIGURE 2:** PET-CT image of patient 53 at baseline (A, D, G), interim (B, E, H) and end of treatment (C, F, I) showing interim PET-CT positivity by both RIW and Deauville criteria in lung

and right cervical lymph node (arrows) which have resolved at the end of treatment (False positive interim PET).

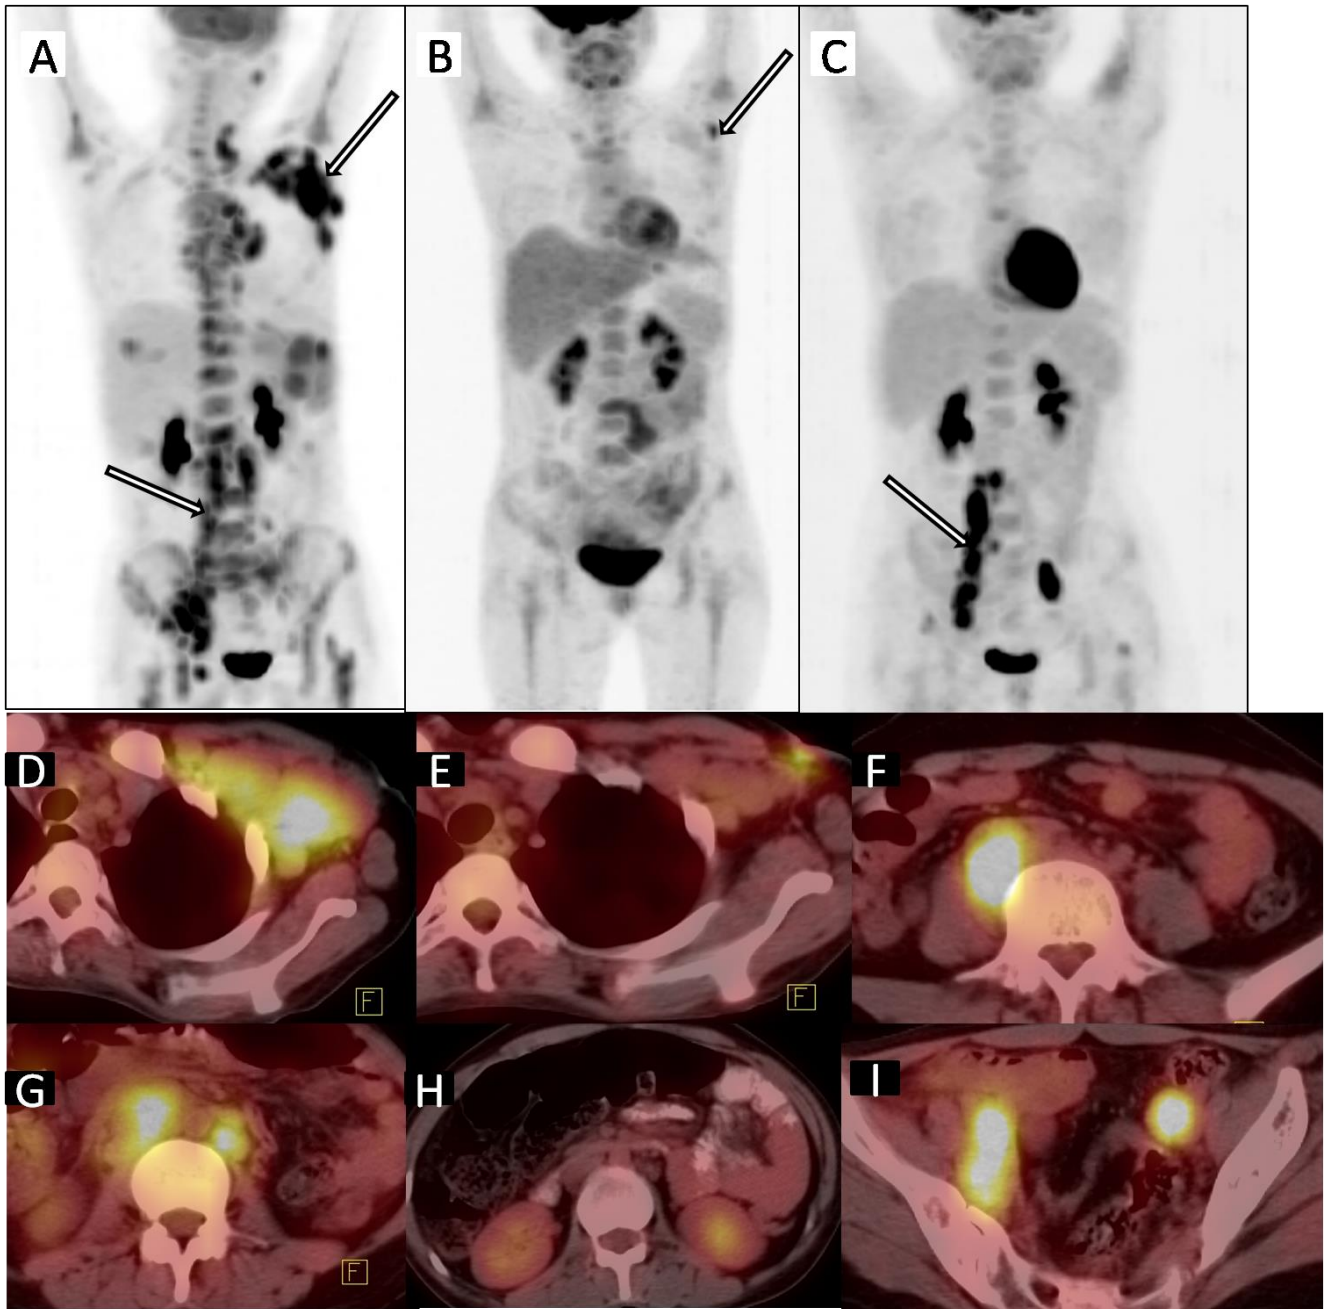

**SUPPLEMENTAL FIGURE 3:** PET-CT image of patient no 17 at baseline (A, D, G), interim (B, E, H) and end of treatment (C, F, I) which was Deauville score 3 (CR) at interim assessment with Deauville criteria and Deauville score 5 (C, F, I) in retroperitoneal lymph nodes (arrows) which was negative in previous scan (B, E, H) (True Positive at end of treatment).

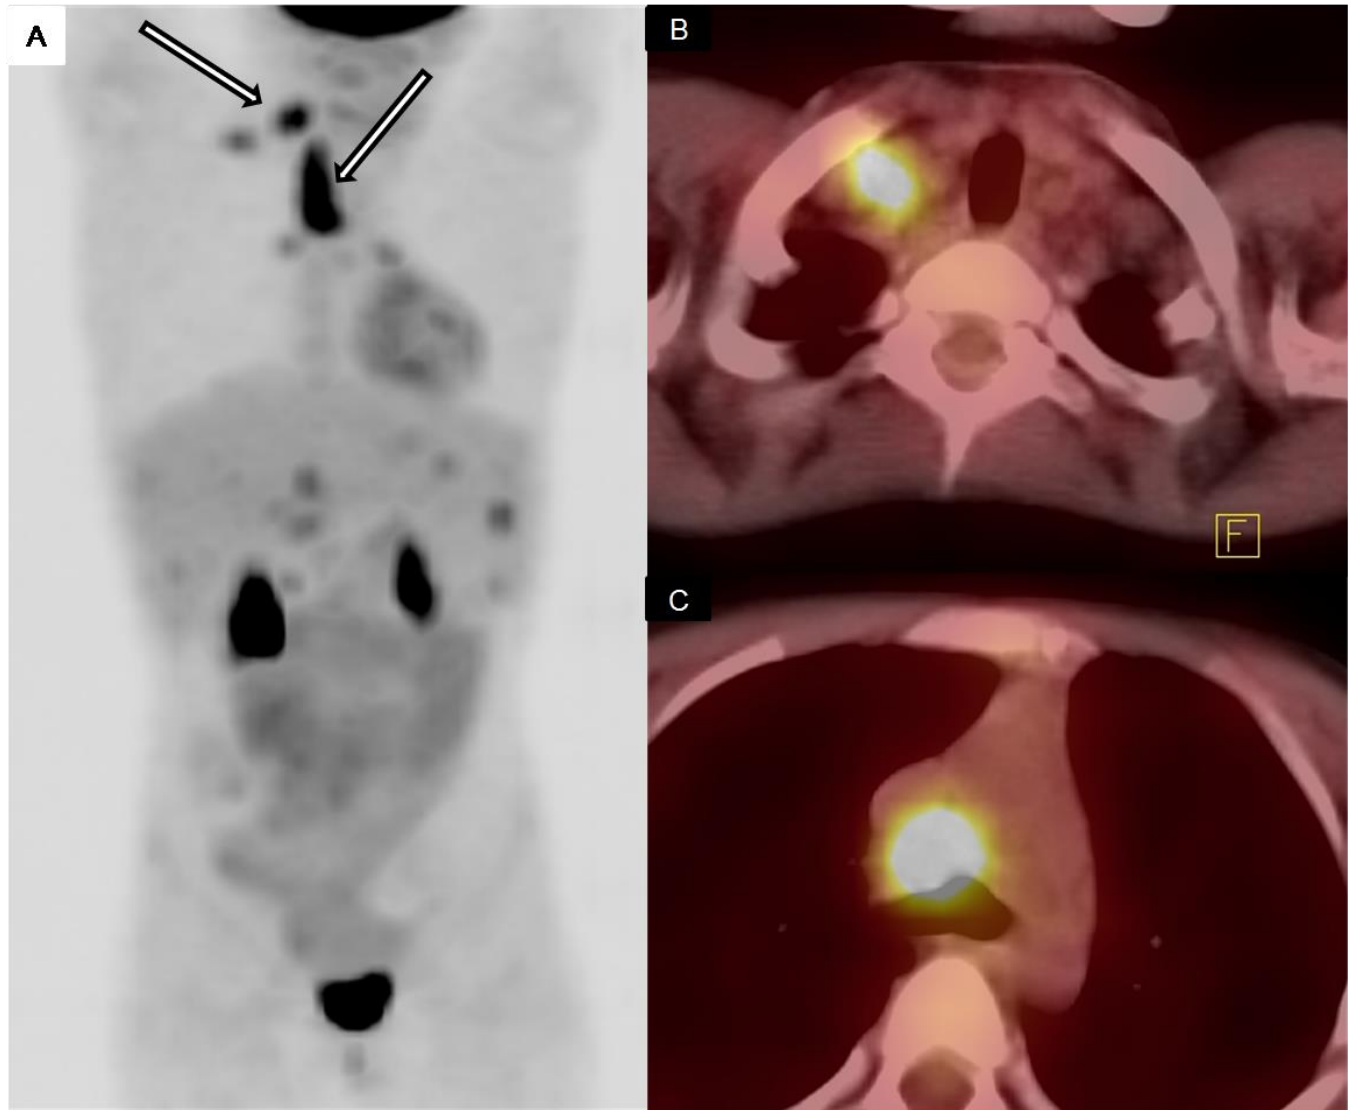

**SUPPLEMENTAL FIGURE 4:** PET-CT image of patient no 21 at end of treatment showing PET-CT positivity at mediastinal lymph node (arrows in A, B ,C) which was positive for tuberculosis on biopsy. Patient received anti-tubercular therapy and is disease free at last follow up (False positive at end of treatment).

**Supplemental Table 1: Baseline staging, response and follow up in study patients**

| Patient No | CT Stage | PET Stage | Cause for upstaging/ downstaging*  | CT-2 | PET/CT-2 (RIW) | PET/CT-2 (DC) | CT-3 | PET/CT-3 (RIW) | PET/CT-3 (DA) | Outcome                                      | RT  |
|------------|----------|-----------|------------------------------------|------|----------------|---------------|------|----------------|---------------|----------------------------------------------|-----|
| 1          | 2        | 4         | Uptake in bone marrow              | PR   | PR             | PR            | CR   | CR             | NA            | Alive at 94.4 months                         | Yes |
| 2          | 1        | 1         | -                                  | CR   | PR             | PR            | CR   | CR             | CR            | Alive at 94.2 months                         | Yes |
| 3          | 3        | 3         | -                                  | PR   | CR             | CR            | CR   | CR             | CR            | Alive at 84.2 months                         | Yes |
| 4          | 1        | 1         | -                                  | PR   | CR             | CR            | CR   | CR             | CR            | Alive at 86.2 months                         | Yes |
| 5          | 3        | 3         | -                                  | PR   | PR             | NA            | PD   | PD             | NA            | Alive at 86.5 months                         | -   |
| 6          | 3        | 2         | No uptake in RPLN                  | PR   | CR             | CR            | CR   | CR             | CR            | Alive at 90.7 months                         | -   |
| 7          | 1        | 3         | Uptake in RPLN, spleen             | PR   | CR             | CR            | CR   | PD             | CR            | Alive at 87.7 months                         | Yes |
| 8          | 2        | 2         | -                                  | PR   | PR             | PR            | PR   | CR             | CR            | Alive at 90.0 months                         | Yes |
| 9          | 2        | 2         | -                                  | PR   | CR             | CR            | CR   | CR             | CR            | Alive at 90.2 months                         | Yes |
| 10         | 3        | 3         | -                                  | PR   | PR             | NA            | CR   | PR             | CR            | Alive at 90.4 months                         | -   |
| 11         | 2        | 2         | -                                  | CR   | CR             | CR            | CR   | CR             | CR            | Alive at 90.5 months                         | Yes |
| 12         | 1        | 2         | Uptake in mediastinal LN           | PR   | CR             | CR            | PR   | CR             | CR            | Alive at 90.6 months                         | Yes |
| 13         | 2        | 1         | Uptake only in right cervical LN   | PR   | CR             | CR            | PR   | CR             | CR            | Alive at 91.8 months                         | Yes |
| 14         | 3        | 3         | -                                  | PR   | PR             | PR            | CR   | PR             | CR            | Alive at 92.1 months                         | Yes |
| 15         | 3        | 4         | Uptake in bone marrow              | PR   | PR             | CR            | CR   | CR             | CR            | Alive at 95.6 months                         | Yes |
| 16         | 2        | 2         | -                                  | CR   | PR             | PR            | CR   | PR             | CR            | Alive at 96.7 months                         | Yes |
| 17         | 4        | 4         | -                                  | PR   | PR             | PR            | PD   | PD             | PD            | Relapse at 8.6 months<br>Died at 11.2 months | Yes |
| 18         | 1        | 3         | Uptake in RPLN, spleen             | PR   | CR             | CR            | CR   | CR             | CR            | Alive at 97.3 months                         | Yes |
| 19         | 4        | 4         | -                                  | CR   | PR             | PR            | CR   | CR             | CR            | Alive at 97.5 months                         | -   |
| 20         | 1        | 4         | Uptake in vertebrae, spleen        | PR   | CR             | CR            | NA   | NA             | NA            | Alive at 94.4 months                         | Yes |
| 21         | 2        | 3         | Uptake in mediastinal LN           | PR   | CR             | CR            | PR   | PD             | PD            | Alive at 94 months                           | -   |
| 22         | 1        | 1         | -                                  | CR   | CR             | CR            | CR   | CR             | CR            | Alive at 94 months                           | Yes |
| 23         | 1        | 1         | -                                  | CR   | CR             | CR            | CR   | CR             | CR            | Alive at 92.9 months                         | Yes |
| 24         | 1        | 1         | -                                  | CR   | PR             | NA            | CR   | CR             | CR            | Alive at 90.9 months                         | Yes |
| 25         | 2        | 2         | -                                  | PR   | PR             | CR            | PR   | CR             | CR            | Alive at 43.9 months                         | -   |
| 26         | 1        | 2         | Uptake in bilateral cervical LN    | PR   | CR             | CR            | CR   | CR             | CR            | Alive at 85.1 months                         | Yes |
| 27         | 2        | 2         | -                                  | CR   | CR             | CR            | CR   | CR             | CR            | Alive at 81.6 months                         | Yes |
| 28         | 2        | 4         | Uptake in spleen, bone marrow      | PR   | CR             | CR            | CR   | CR             | CR            | Alive at 64.2 months                         | -   |
| 29         | 4        | 4         | -                                  | PR   | PR             | PR            | CR   | CR             | CR            | Alive at 82.3 months                         | -   |
| 30         | 1        | 1         | -                                  | PR   | CR             | CR            | CR   | CR             | CR            | Relapse at 65 months<br>Alive at 80.2 months | Yes |
| 31         | 2        | 2         | -                                  | CR   | CR             | CR            | CR   | CR             | CR            | Lost to follow up after 18 months            | -   |
| 32         | 1        | 1         | -                                  | PR   | CR             | CR            | CR   | CR             | CR            | Alive at 80.2 months                         | Yes |
| 33         | 3        | 2         | No uptake in RPLN                  | CR   | PR             | NA            | CR   | CR             | CR            | Alive at 44.1 months                         | -   |
| 34         | 2        | 3         | Uptake in spleen                   | PR   | CR             | CR            | PR   | CR             | CR            | Alive at 80.5 months                         | Yes |
| 35         | 2        | 3         | Uptake in cervical, mediastinal LN | PR   | CR             | CR            | CR   | CR             | CR            | Relapsed at 11 months<br>Died at 41.4 months | -   |
| 36         | 3        | 3         | -                                  | CR   | CR             | CR            | CR   | CR             | CR            | Relapse at 28 months<br>Alive at 74.8 months | -   |
| 37         | 3        | 4         | Uptake in left pelvic bone         | PR   | CR             | CR            | CR   | CR             | CR            | Alive at 81.3 months                         | -   |
| 38         | 3        | 3         | -                                  | CR   | CR             | CR            | CR   | CR             | CR            | Alive at 74.3 months                         | -   |
| 39         | 1        | 3         | Uptake in mediastinum, spleen      | CR   | CR             | CR            | CR   | CR             | CR            | Alive at 76 months                           | Yes |
| 40         | 4        | 4         | -                                  | CR   | CR             | CR            | CR   | CR             | CR            | Alive at 76.9 months                         | -   |
| 41         | 2        | 2         | -                                  | CR   | CR             | CR            | CR   | CR             | CR            | Alive at 76.2 months                         | Yes |
| 42         | 4        | 4         | -                                  | PR   | CR             | CR            | CR   | CR             | CR            | Alive at 75.8 months                         | -   |
| 43         | 4        | 4         | -                                  | CR   | CR             | CR            | CR   | CR             | CR            | Alive at 77.2 months                         | -   |
| 44         | 2        | 3         | Uptake in RPLN                     | CR   | CR             | CR            | CR   | CR             | CR            | Alive at 79.1 months                         | Yes |
| 45         | 2        | 3         | Uptake in RPLN, spleen             | PR   | PR             | PR            | CR   | CR             | CR            | Alive at 78.6 months                         | Yes |
| 46         | 2        | 3         | Uptake in spleen                   | PR   | PR             | CR            | PR   | CR             | CR            | Alive at 73.6 months                         | Yes |
| 47         | 2        | 1         | Uptake only in right cervical LN   | CR   | CR             | CR            | CR   | CR             | CR            | Alive at 73.2 months                         | Yes |
| 48         | 3        | 4         | Uptake in bone marrow, liver       | PR   | PR             | PR            | PR   | NA             | NA            | Alive at 72.9 months                         | -   |
| 49         | 1        | 1         | -                                  | CR   | CR             | CR            | CR   | CR             | CR            | Alive at 71.1 months                         | Yes |
| 50         | 1        | 3         | Uptake in RPLN, spleen             | PR   | CR             | CR            | PR   | CR             | CR            | Alive at 73.9 months                         | Yes |
| 51         | 4        | 4         | -                                  | PR   | CR             | CR            | PR   | CR             | CR            | Alive at 69.9 months                         | Yes |
| 52         | 3        | 3         | -                                  | CR   | PR             | CR            | CR   | PD             | PD            | Alive at 72.7 months                         | -   |
| 53         | 3        | 4         | Uptake in lung, vertebrae          | PR   | PR             | PR            | PR   | CR             | CR            | Alive at 60.5 months                         | Yes |
| 54         | 1        | 2         | -                                  | CR   | CR             | CR            | CR   | CR             | CR            | Alive at 94.7 months                         | Yes |
| 55         | 1        | 3         | Uptake in RPLN, spleen             | CR   | PR             | CR            | CR   | CR             | NA            | Alive at 87.9 months                         | Yes |
| 56         | 2        | 3         | Uptake in left cervical LN         | PR   | PR             | PR            | CR   | CR             | CR            | Alive at 84.8 months                         | -   |
| 57         | 2        | 3         | Uptake in RPLN, spleen             | CR   | CR             | CR            | CR   | CR             | CR            | Died at 11 months due to pulmonary toxicity  | Yes |

\*Additional sites of involvement seen on PET-CT or only site of involvement in case of down staging are shown. LN-lymph node, RPLN- retroperitoneal lymph node, RIW= Revised International Working group response criteria, DC-Deauville criteria, RT- Radiotherapy, CR-Complete response, PR-partial response
